# Supplementary material
Source: Springer Nature journal article supplement (https://www.springermedizin.de/resource/supplementary/13024_2012_335_MOESM3_ESM.pdf/9643754)

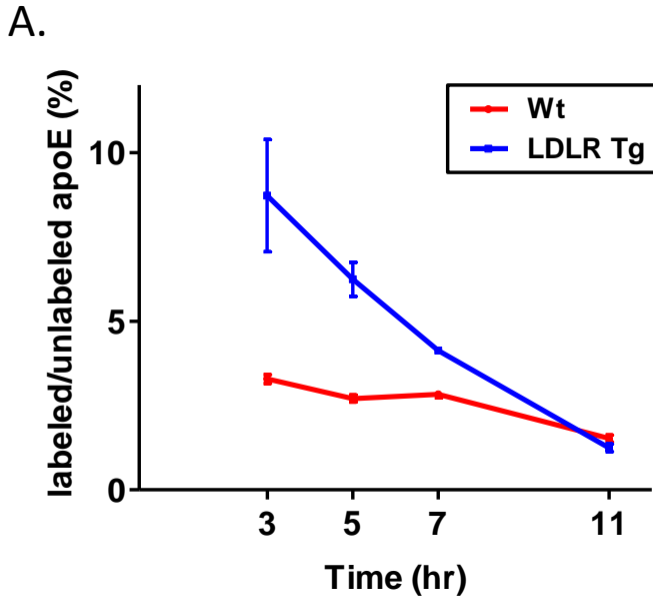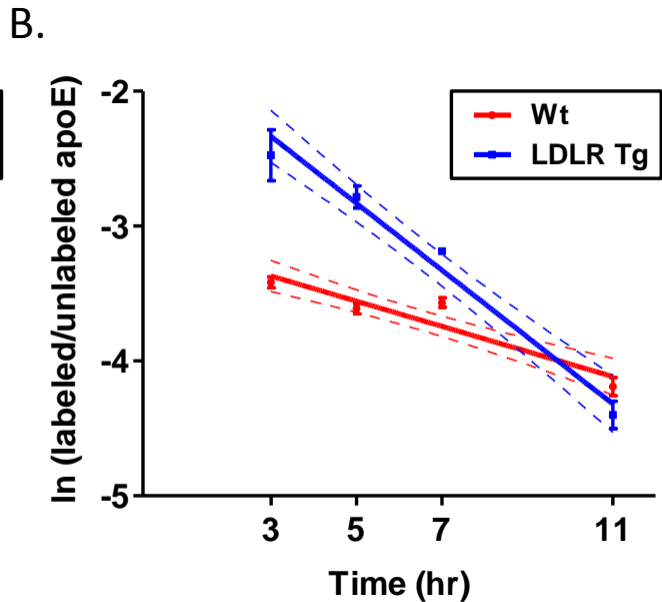

Supplement: MOESM3 [file 9643754]
